# Supplementary material for: Are parenting practices associated with the same child outcomes in sub-Saharan African countries as in high-income countries? A review and synthesis
Source: PubMed Central journal article supplement (PMC6326425; doi:10.1136/bmjgh-2018-000912), 2018-12-27
Supplement: bmjgh-2018-000912supp001.pdf [file bmjgh-2018-000912supp001.pdf]

| <b>Supplementary Table 1.1: Parenting and SRH in Sub-Saharan Africa</b>                                              |                                                                                                                                                               |                                                                                                                                                                                      |                                                                                                                                         |                                                                                                                                                    |                                                                                                                                                                                                                                                                             |    |
|----------------------------------------------------------------------------------------------------------------------|---------------------------------------------------------------------------------------------------------------------------------------------------------------|--------------------------------------------------------------------------------------------------------------------------------------------------------------------------------------|-----------------------------------------------------------------------------------------------------------------------------------------|----------------------------------------------------------------------------------------------------------------------------------------------------|-----------------------------------------------------------------------------------------------------------------------------------------------------------------------------------------------------------------------------------------------------------------------------|----|
| Study (Authors, Year);<br><u>Location; Design</u>                                                                    | Sampling Procedure (& Sample)                                                                                                                                 | Parenting Variables                                                                                                                                                                  | WHO Parenting Dimensions                                                                                                                | Child/ Adolescent Health Outcomes                                                                                                                  | Main findings (significant at P<0.05)                                                                                                                                                                                                                                       | QA |
| 47. Sidze EM et al. (2015) Kenya. <u>Longitudinal</u>                                                                | 689 sexually experienced 12-22 yr olds (61%M) from Nairobi informal settlements. Random sub-sample Wave 2 Transition to Adulthood study.                      | Young person's assessment (low, medium, high) of: (i) quality of parent-child connectedness, (ii) parental monitoring.                                                               | <u>Connection</u><br><u>Positive behaviour control</u>                                                                                  | Sexual activity in last 12 months; multiple sexual partners; condom use at last sex.                                                               | Adolescent males with medium or high parental connection more likely to have used a condom at last sex.                                                                                                                                                                     | 9  |
| 48. Okigbo CC et al. (2015) Kenya. <u>Longitudinal</u>                                                               | Random sample 2 informal settlements, Nairobi. 1,927 unmarried 12-19 yr olds (52% M) at Wave 1 Transition to Adulthood study.                                 | Parental monitoring – of whereabouts. General communication. Discipline: did parents/ guardian 1) verbally reprimand or 2) physically hit them?                                      | <u>Connection: General communication</u><br><u>Positive behaviour control</u><br><u>Negative behaviour control</u>                      | Transition to first sex between Wave 1 and 2.                                                                                                      | 'Cross- gender' general communication with parents associated with delay in transition to sex by Wave 2.                                                                                                                                                                    | 10 |
| 50. Sidze EM & Defo BK (2013) Cameroon. <u>Longitudinal</u>                                                          | 447 sexually active, unmarried 15-24 yr olds (227 F). Representative, random sample from Cameroon Family and Health Survey, Bandjoun.                         | Parent-child relationships measured as parental monitoring, parent-child communication about sexual matters.                                                                         | <u>Connection*(quality of parent-child relationship)</u><br><u>Connection: SRH communication</u><br><u>Positive behaviour control</u>   | Number of sexual partners in last 12 months. Frequency of contraceptive use in last 12 months. Tendency of having occasional, concurrent partners. | Higher quality of parent child relationships, lower odds of: (i) young males having multiple sexual partners (ii) young females having occasional, concurrent sexual partners.                                                                                              | 5  |
| 51. Dimbuene ZT & Defo BK (2012). West Cameroon. <u>Cross-sectional</u>                                              | 1, 182 12-24 yr olds from Bandjoun (52% F). Random representative sub-sample of CFHS.                                                                         | Youth report on quality of parent-child relationship, parent-child communication about SRH. Parental monitoring of behaviour.                                                        | <u>Connection * (quality of parent-child relationship)</u><br><u>Connection: SRH communication</u><br><u>Positive behaviour control</u> | Sexual debut or waiting time to premarital sex.                                                                                                    | Quality of parent-child relationships & higher parental monitoring decreased risk of premarital intercourse. Parent-child communication associated with higher risk of sexual debut.                                                                                        | 3  |
| 52. Biddlecom A et al. (2009). Burkina Faso, Ghana, Malawi, Uganda. <u>Cross-sectional</u>                           | Two stage cluster design: 9,762 unmarried 15-19 yr olds (4,420 F). (Burkina Faso, 2,948; Ghana, 2,426; Malawi, 2,025, Uganda, 2,363).                         | Adolescents' perceptions of: Parental monitoring. Two measures of parental communication about SRH 1) who adolescent talked to about sex 2) who they heard from about contraception. | <u>Connection: SRH communication</u><br><u>Positive behaviour control</u>                                                               | Sexual activity in last year. Contraceptive use at last sex.                                                                                       | Adolescent M (4/4) and F (3/4 countries) with low parental monitoring more likely to be sexually active. Parental monitoring not associated with contraceptive use at last sex. Parent-child SRH communication associated with contraceptive use [Ghanian F /Ugandan M & F] | 5  |
| 53. Peltzer K (2010). Botswana, Kenya, Namibia, Senegal, Swaziland, Uganda, Zambia, Zimbabwe. <u>Cross-sectional</u> | 10,070 school children (13-15 yr olds) from 8 countries, nationally representative samples. Two stage cluster sample design (approx. 50% F in 6/8 countries). | Parental bonding, parental connection, parental supervision.                                                                                                                         | <u>Connection</u><br><u>Positive behaviour control</u>                                                                                  | Risky sexual behaviour. Early sexual debut <15 years old.                                                                                          | Early sexual debut was associated with poor parental connectedness (only in girls).                                                                                                                                                                                         | 4  |
| 55. Fako TT (2006) Botswana. <u>Cross-sectional</u>                                                                  | 1,294 students (55%F; 57% urban) from secondary schools/ tertiary institutions (12-22+ yrs). Representative sample.                                           | Students' perception of family coherence: psychological bonding with parents, extent to which sex discussed in family.                                                               | <u>Connection</u><br><u>Connection: SRH communication</u>                                                                               | Willingness to test for HIV/ AIDS.                                                                                                                 | Attachment to parents (& grandparents); family emotional support and discussing sex within family associated with willingness to test for HIV/AIDS.                                                                                                                         | 3  |
| 56. Negeri EL (2014) Ethiopia. <u>Cross-sectional</u>                                                                | 1,183 15-24 yr olds (783 M) in west. Random sample of in-school (600) and out-of-school (583) youth.                                                          | Youth reported 1) Parental monitoring (Silverberg's parental monitoring scale) 6 items, 2) Parent-adolescent communication scale.                                                    | <u>Connection: SRH communication</u><br><u>Positive behaviour control</u>                                                               | Sexual risk behaviour; substance use; consistent condom use.                                                                                       | Youth with parental monitoring less likely to have had premarital sex. Odds of having had sex 2 x higher among youths who didn't discuss sexual matters with parents.                                                                                                       | 3  |
| 57. Cherie A & Berhanie Y (2015) Ethiopia. <u>Cross-sectional</u>                                                    | 3,543 randomly selected Addis Ababa high school students (1, 789 F) age 15-24 yrs.                                                                            | Parent-adolescent communication, parental monitoring, parental connectedness, parenting styles.                                                                                      | <u>Connection</u><br><u>Connection: SRH communication</u><br><u>Positive behaviour control</u><br><u>Parenting styles</u>               | Risky sexual behaviour (Youth Risk Behaviour Survey). (youth reported)                                                                             | Students' safer sexual behaviour associated with parental connectedness, parental monitoring, authoritarian parents, authoritative parents & parents who communicated with them about SRH.                                                                                  | 3  |
| 58. Dessie Y et al. (2014). Ethiopia. <u>Cross-sectional</u>                                                         | 633 13-18 yr olds with sexual initiations from Harar (327F). 81% 'in-school'. Random sample, community based study.                                           | Parental monitoring, SRH communication. Parenting styles measured via 2 questions on adolescents' perceptions of parents' supportiveness (warmth) and strictness (control).          | <u>Connection: SRH communication</u><br><u>Positive behaviour control</u><br><u>Parenting styles</u>                                    | Risky sexual practices 1) Not using condom/contraceptive at last sex, 2) Multiple sexual partners in last 12 months.                               | High parental monitoring decreased risky sexual practices. Satisfactory level of adolescent-parent SRH communication decreased †(marginal) risky sexual practices. No association between parenting styles and risky sexual practices.                                      | 3  |
| 59. Dimbuene ZT & Defo BK (2011). West Cameroon. <u>Cross-sectional</u>                                              | 1,025 sexually experienced 12-24 yr olds from Bandjoun (55% F). Representative sample.                                                                        | Quality of parent-child relationships, parent-child communication about sex, parental control.                                                                                       | <u>Connection * (quality of parent-child relationship)</u><br><u>Connection: SRH communication</u><br><u>Positive behaviour control</u> | Risky sexual behaviour.                                                                                                                            | Quality of parent/guardian - youth relationships and parental control decrease the odds of risky sexual behaviour.                                                                                                                                                          | 5  |
| 60. Kumi-Kyereme A et al. (2007) Ghana.                                                                              | 4,430 unmarried 12-19 yr olds (2, 229 M).                                                                                                                     | Communication about SRH, types of people who talked to adolescents about                                                                                                             | <u>Connection: SRH communication</u><br><u>Positive behaviour control</u>                                                               | Sexual activity in last 12 months.                                                                                                                 | Negative association between parental monitoring and adolescents' sexual activity (M                                                                                                                                                                                        | 3  |

| <b>Supplementary Table 1.1: Parenting and SRH in Sub-Saharan Africa</b> |                                                                                                                                                      |                                                                                                                            |                                                                                             |                                   |                                                                                                                                                                              |    |
|-------------------------------------------------------------------------|------------------------------------------------------------------------------------------------------------------------------------------------------|----------------------------------------------------------------------------------------------------------------------------|---------------------------------------------------------------------------------------------|-----------------------------------|------------------------------------------------------------------------------------------------------------------------------------------------------------------------------|----|
| Study (Authors, Year);<br>Location; Design                              | Sampling Procedure (& Sample)                                                                                                                        | Parenting Variables                                                                                                        | WHO Parenting Dimensions                                                                    | Child/ Adolescent Health Outcomes | Main findings (significant at P<0.05)                                                                                                                                        | QA |
| <u>Cross-sectional</u>                                                  |                                                                                                                                                      | SRH, parental monitoring.                                                                                                  |                                                                                             |                                   | & F). Limited effects of communication.                                                                                                                                      |    |
| 61. Tenkorang EY & Adjei JK (2015) Ghana.<br><u>Cross-sectional</u>     | 2,387 12-19 yr olds (51% M). Stratified sample (urban & rural).                                                                                      | Parental monitoring, communication (about sex-related issues).                                                             | <u>Connection: SRH communication</u><br><u>Positive behaviour control</u>                   | Transition to first sex.          | Adolescents closely monitored by parents less likely to transition to first sex.                                                                                             | 5  |
| 62. Marston M et al. (2013) Kenya. <u>Longitudinal</u>                  | Random sample, informal settlements, Nairobi. 1,754 sexually inexperienced 12-16 yr olds (at wave 1). 92 experienced early sexual transition (53 M). | Supervision (parental monitoring). Parental connection (support). Family dysfunction (parent jobless/ adult ever hit you). | <u>Connection</u><br><u>Positive behaviour control</u><br><u>Negative behaviour control</u> | Early sexual debut; self-esteem.  | Lack of parental supervision was predictor of sexual debut (M only). For both M & F, transition to first sex associated with “having experienced severe family dysfunction.” | 8  |

| <b>Supplementary Table 1.2: Parenting and Child Adaptive Functioning (Development) in Sub-Saharan Africa</b> |                                                                                                                                                               |                                                                                                                                                                                                             |                                                                                                                                                             |                                                                                                                                                                                                              |                                                                                                                                                                                                                                                                          |    |
|--------------------------------------------------------------------------------------------------------------|---------------------------------------------------------------------------------------------------------------------------------------------------------------|-------------------------------------------------------------------------------------------------------------------------------------------------------------------------------------------------------------|-------------------------------------------------------------------------------------------------------------------------------------------------------------|--------------------------------------------------------------------------------------------------------------------------------------------------------------------------------------------------------------|--------------------------------------------------------------------------------------------------------------------------------------------------------------------------------------------------------------------------------------------------------------------------|----|
| Study (Authors, Year);<br>Location                                                                           | Sampling Procedure (& Sample)                                                                                                                                 | Parenting Variables                                                                                                                                                                                         | WHO Parenting Dimensions                                                                                                                                    | Child/ Adolescent Health Outcomes                                                                                                                                                                            | Main findings (significant at P<0.05)                                                                                                                                                                                                                                    | QA |
| 63. Torimiro DO et al. (2004). Nigeria.<br><u>Cross-sectional</u>                                            | 186 parents from rural South West/ Oyo state (85% M) and their children (11-18 yr olds, 63% M). Multi-stage/ random sampling.                                 | Parental reports about parent and child. Measured 21 aspects of parenting roles including discipline, support, guidance.                                                                                    | <u>Connection</u><br><u>Positive behaviour control</u><br><u>Provision and protection</u>                                                                   | Child development. Child cognitive, social, physical, emotional and moral development.                                                                                                                       | Positive relationship between level of parenting role performance and child development.                                                                                                                                                                                 | 0  |
| 64. Latouf N & Dunn M (2010). South Africa.<br><u>Cross-sectional</u>                                        | 30 parents (15 M) of 25 yr old children (16 girls) and their female teacher from Northern Province school. Convenience sample.                                | Parents completed the Parental Styles Dimensions Questionnaire (PSDQ: Robinson <i>et al</i> 2001) for self and spouse.                                                                                      | <u>Parenting styles: Authoritarian, Authoritative, Permissive.</u>                                                                                          | Teacher observation of child behaviour. Aggression; disrespect; hyperactivity; detachment. Pro-social behaviour & anti-social behaviour.                                                                     | Parent-rated (mothers) authoritative parenting style associated with teacher-rated child pro-social behaviour. Parent-rated (mothers) authoritarian parenting style associated with teacher-rated child anti-social behaviour.                                           | 4  |
| 65. Kritzas N & Grobler, AA (2005). South Africa.<br><u>Cross-sectional</u>                                  | 360 English speaking Grade 12 learners (215 F), mean age 17.6 yrs, from Bloemfontein.                                                                         | Adolescents completed Parental Authority Questionnaire about mothers and fathers styles: 1) permissiveness, 2) authoritarianism, 3) authoritative.                                                          | <u>Parenting styles: Authoritarian, Authoritative, Permissive.</u>                                                                                          | Orientation to Life Questionnaire (OLQ) and the Cope Scale (adolescents' coping strategies, sense of coherence and resilience).                                                                              | Authoritative parenting positively associated with adolescent's resilience. Paternal authoritarian style associated with emotion focused coping strategies (but only in white adolescents).                                                                              | 3  |
| 66. Tomlinson M et al. (2005). South Africa.<br><u>Longitudinal</u>                                          | 147 mother-infant dyads from Khayelitsha and 'Town II', Cape Town. Mothers aged < 20-39yrs: infants (53% M). 98 at 18 month follow-up. Representative sample. | Mother-child interactions: responsiveness, acceptance & warmth; coercive, intrusive behaviours; remote, disengaged behaviours.                                                                              | <u>Connection</u> (lack of)<br><u>Negative behaviour control</u>                                                                                            | Infant attachment                                                                                                                                                                                            | Indices of poor parenting at 2 and 18 months associated with insecure infant attachment. 2 month predictors of insecure infant attachment were maternal intrusiveness and remoteness.                                                                                    | 9  |
| 67. Roman NV et al. (2015). South Africa.<br><u>Cross-sectional</u>                                          | 853 Grade 11 public school learners from 8 school districts in Western Cape (486 F), mean age, 17 yrs.                                                        | Learners completed the Parenting Style and Dimensions Questionnaire (PSDQ).                                                                                                                                 | <u>Parenting styles: Authoritarian, Authoritative, Permissive.</u>                                                                                          | Adoption of life goals/ aspirations: Psychological Needs Scale (PNS); Aspiration Index (AI); Positive/ negative affect scale (psychological wellbeing).                                                      | Authoritative parenting predicted intrinsic life goals/ aspirations. Authoritarian & permissive parenting predicted extrinsic life goals. Maternal & paternal authoritarian and maternal permissive parenting predicted negative affect.                                 | 3  |
| 68. Allen AB et al. (2014). South Africa<br><u>Cross-sectional</u>                                           | 361 women (22-52 yrs old) from Tshwane (living with HIV) with 6-10 yr old child. From primary health and immunology clinics. Sampling procedure not reported. | Mother reported 1) Parenting Stress Index (PSI) – distress/ parent-child dysfunction, 2) Coping with child's negative emotion scale – positive (e.g. encouragement) vs negative (e.g. punitive) dimensions. | <u>Connection</u><br><u>'Parenting style' but not Baumrind's – 'positive' (encouragement) vs 'negative' (punitive)</u><br><u>Negative behaviour control</u> | Mother reported on child's adaptive functioning: communication, daily living skills, socialisation. Parental report on child's internalising/ externalising behaviour via Child Behaviour Check List (CBCL). | Negative maternal parenting style associated with higher child internalising + externalising behaviour. Positive parenting style associated with lower externalising behaviour, higher socialisation & daily living skills and did not predict internalising behaviours. | 4  |

| <b>Supplementary Table 1.3: Parenting and Child Education/ Academic Achievement in Sub-Saharan Africa</b> |                                                                                                                                                     |                                                                                                                                     |                                                                                           |                                                                                                                          |                                                                                        |    |
|-----------------------------------------------------------------------------------------------------------|-----------------------------------------------------------------------------------------------------------------------------------------------------|-------------------------------------------------------------------------------------------------------------------------------------|-------------------------------------------------------------------------------------------|--------------------------------------------------------------------------------------------------------------------------|----------------------------------------------------------------------------------------|----|
| Study (Authors, Year);<br>Location                                                                        | Sampling Procedure (& Sample)                                                                                                                       | Parenting Variables                                                                                                                 | WHO Parenting Dimensions                                                                  | Child/ Adolescent Health Outcomes                                                                                        | Main findings (significant at P<0.05)                                                  | QA |
| 69. Marjoribanks K & Mboya M (2000). South Africa.<br><u>Cross-sectional</u>                              | 845 secondary school students (435F) from 5 rural schools (497) and 3 urban schools (348) in rural Eastern Cape & urban Metropolitan Cape. Mean age | Parents' support for learning (19 items) related to 1) parenting style 2) parents' educational expectations 3) parenting practices. | <u>Connection</u><br><u>Positive behaviour control</u><br><u>Provision and protection</u> | Self-Description Inventory (SDI) for African students (measures adolescent self-concept). Learning Process Questionnaire | Parents' support for learning associated with adolescents' academic goal orientations. | 4  |

| Supplementary Table 1.3: Parenting and Child Education/ Academic Achievement in Sub-Saharan Africa |                                                                                                                                                          |                                                                                                                                                                                                                               |                                                                                 |                                                                                                                            |                                                                                                                                                                                                                                                                                                                                           |    |
|----------------------------------------------------------------------------------------------------|----------------------------------------------------------------------------------------------------------------------------------------------------------|-------------------------------------------------------------------------------------------------------------------------------------------------------------------------------------------------------------------------------|---------------------------------------------------------------------------------|----------------------------------------------------------------------------------------------------------------------------|-------------------------------------------------------------------------------------------------------------------------------------------------------------------------------------------------------------------------------------------------------------------------------------------------------------------------------------------|----|
| Study (Authors, Year); Location                                                                    | Sampling Procedure (& Sample)                                                                                                                            | Parenting Variables                                                                                                                                                                                                           | WHO Parenting Dimensions                                                        | Child/ Adolescent Health Outcomes                                                                                          | Main findings (significant at P<0.05)                                                                                                                                                                                                                                                                                                     | QA |
|                                                                                                    | 18.3 yrs. Sampling procedure not reported.                                                                                                               |                                                                                                                                                                                                                               |                                                                                 | (measures academic goal orientation).                                                                                      |                                                                                                                                                                                                                                                                                                                                           |    |
| 70. Bojuwoye O & Narain M (2008). South Africa. <u>Cross-sectional</u>                             | 115 parents (90 F) and their 115 15-18 yr old children (77 F) from 4 Durban schools. Sampling procedure not reported.                                    | Parent reported: parental aspirations for child's education; parent-child communication about school; parental involvement at home; school-home communication; parents' participation in school-related activities.           | <u>Connection</u><br><u>Positive behaviour control</u><br><u>Role modelling</u> | Formal school results: academic achievement.                                                                               | Parent's involvement in their children's education positively associated with children's academic achievement.                                                                                                                                                                                                                            | 2  |
| 71. Cherian VI (1993). South Africa <u>Cross-sectional</u>                                         | 1,021 urban & rural black Xhosa speaking 13-17 yr olds (652 F). Standard 7, from Transkei. Stratified random sample.                                     | Parents' interest in child's education: parents' 1) discussion of education with child 2) encouragement 3) help with studies.                                                                                                 | <u>Connection</u>                                                               | Standard achievement tests/ exam scores at end of standard 7.                                                              | Positive association between parental interest and children's academic achievement (monogamous or polygynous families).                                                                                                                                                                                                                   | 4  |
| 72. Sherr L et al (2016). South Africa, Malawi. <u>Longitudinal</u>                                | 989 4-13 yr olds (503 F) and their primary caregiver attending community based organisations. Baseline and 15 month follow up. Stratified random sample. | Carer reported: harsh discipline (punishment at home) with Parent Child Conflict Tactics Scale & International Society for Prevention of Child Abuse and Neglect (ISPCAN) screening tools (psychological/ physical violence). | <u>Negative behaviour control</u><br><u>(harsh)</u>                             | Carer reported educational outcomes. Including school: enrolment, attendance, progress.                                    | <i>Baseline:</i> physical violence/ harsh discipline associated with lower odds of being in the correct class. <i>Follow up:</i> children who experienced psychological violence as discipline >10 x less likely to be enrolled in school. For HIV +ve children, physical violence as discipline associated with poor school performance. | 10 |
| 73. Pieterse D (2015). South Africa. <u>Longitudinal</u>                                           | 4,747 14-22 yr olds (52% F) from Cape Town. Random sample (Wave 1).                                                                                      | Young people's report: experience of physical and emotional violence by parents in the home (aggregate score).                                                                                                                | <u>Negative behaviour control</u><br><u>(harsh)</u>                             | Education outcomes, including: numeracy scores and school drop-out.                                                        | Physical and emotional maltreatment associated with reduction in numeracy. Significant (& large) <i>effect</i> of childhood maltreatment on probability of school drop-out.                                                                                                                                                               | 4  |
| 74. Mboya M (1996). South Africa <u>Cross-sectional</u>                                            | 1,192 14-20 yr olds (631 F) from 3 secondary schools in Cape Town Metropolitan area (extremely impoverished).                                            | Students' perceptions – Perceived Parental Behaviour Inventory (PPBI): parents' support & expectations about school, parental participation in school work.                                                                   | <u>Connection</u>                                                               | Self-Description Inventory (SDI) for African students (measures adaptive behaviours, general school/ global self-concept). | Parental support, interest, encouragement & expectations about school were predictors of African adolescents' global self-concept & general school self-concept.                                                                                                                                                                          | 3  |

| Supplementary Table 1.4: Parenting and Mental Health (Depression) in Sub-Saharan Africa |                                                                                                                                              |                                                                                                                                                                      |                                                                                              |                                                                                                  |                                                                                                                                                                                               |    |
|-----------------------------------------------------------------------------------------|----------------------------------------------------------------------------------------------------------------------------------------------|----------------------------------------------------------------------------------------------------------------------------------------------------------------------|----------------------------------------------------------------------------------------------|--------------------------------------------------------------------------------------------------|-----------------------------------------------------------------------------------------------------------------------------------------------------------------------------------------------|----|
| Study (Authors, Year); Location                                                         | Sampling Procedure (& Sample)                                                                                                                | Parenting Variables                                                                                                                                                  | WHO Parenting Dimensions                                                                     | Child/ Adolescent Health Outcomes                                                                | Main findings (significant at P<0.05)                                                                                                                                                         | QA |
| 75. Khasakhala LI et al. (2013). Kenya. <u>Cross-sectional</u>                          | 245 purposefully selected 13-22 yr olds (100 F) attending Nairobi psychiatric outpatient clinic and parents (428: 226 mothers; 202 fathers). | Youth report 'EMBU' (own memories of childhood upbringing): parental-emotional attachment, rejecting behaviour, under-protective behaviour, authoritative behaviour. | <u>Connection</u> ( <i>lack of</i> )                                                         | Youth presenting with major depressive disorders (MDD). Psychiatric disorders.                   | Maternal rejecting behaviour associated with major depressive disorder (MDD) in youth.                                                                                                        | 5  |
| 76. Okello J et al. (2014) Uganda. <u>Cross-sectional</u>                               | 551 13-21 yr olds from 7 government and private secondary schools Gulu District, Northern Uganda. Convenience sample.                        | Adverse Childhood Exposure (ACE) questionnaire (incl. physical abuse). Attachment to/alienation from parents measured with inventory of parent/peer attachment.      | <u>Connection</u><br><u>Negative behaviour control</u>                                       | 'HSCL-37A' used for (self-reported) measures of depression and anxiety.                          | Paternal & maternal attachment associated with less depression and anxiety in adolescents. Alienation by mothers independently associated with increased depression & anxiety in adolescents. | 5  |
| 77. Jewkes RK et al. (2010). South Africa. <u>Longitudinal</u>                          | 2,782 16-23 yr olds (1,415 F) from rural Eastern Cape schools. Baseline stratified 2 stage sample, 2 yr follow up.                           | Young person self-report – Childhood Trauma Questionnaire- emotional neglect/abuse, physical neglect.                                                                | <u>Connection</u> ( <i>lack of</i> )<br><u>Negative behaviour control</u><br><u>(severe)</u> | Depression/ suicidal thoughts (CES-D). Alcohol use – 'AUDIT'. <i>Follow up</i> HSV2 /HIV status. | Emotional neglect in women associated with depression, suicidality, alcohol abuse and incident HSV-2 infection. Emotional neglect in men associated with depression and drug use.             | 11 |
| 78. Maepa MP et al. (2015). South Africa, Zimbabwe. <u>Cross-sectional</u>              | 600 8-18 yr olds: 300 street children (snowball sample) (58% F), 300 non-street children (random sample) (57% F).                            | Parenting Style Index (PSI) (children's self-report).                                                                                                                | <u>Connection</u> ( <i>lack of</i> )<br><u>Positive behaviour control</u> ( <i>lack of</i> ) | Child abuse and trauma scale. Used to assess trauma (as outcome).                                | Parental warmth negatively associated with childhood trauma (homelessness), general abuse. No association between parental supervision & childhood trauma.                                    | 1  |
| 79. Bradford K et al. (2004). South Africa (3 Ethnic groups); Bangladesh; China;        | 9,050 school going 14-17 yr olds from 11 nations. Includes 1,743 South Africans: 635 Black; 520 Colored; 579                                 | Parental monitoring of adolescent behaviours. Parental support - subscale of Child Report of Parent Behaviour                                                        | <u>Connection</u><br><u>Positive behaviour control</u><br><u>Negative behaviour control</u>  | Internalising/ externalising behaviours: social initiative (pro-social behaviour). Child         | Parental support associated with higher youth social initiative (11/11 countries). Psychological control associated with higher                                                               | 4  |

| <b>Supplementary Table 1.4: Parenting and Mental Health (Depression) in Sub-Saharan Africa</b> |                                                                                                                       |                                                                                                                                 |                                                                                                                 |                                                                                                         |                                                                                                                                                                                  |    |
|------------------------------------------------------------------------------------------------|-----------------------------------------------------------------------------------------------------------------------|---------------------------------------------------------------------------------------------------------------------------------|-----------------------------------------------------------------------------------------------------------------|---------------------------------------------------------------------------------------------------------|----------------------------------------------------------------------------------------------------------------------------------------------------------------------------------|----|
| Study (Authors, Year); Location                                                                | Sampling Procedure (& Sample)                                                                                         | Parenting Variables                                                                                                             | WHO Parenting Dimensions                                                                                        | Child/ Adolescent Health Outcomes                                                                       | Main findings (significant at P<0.05)                                                                                                                                            | QA |
| India; Bosnia; Germany; Palestine; USA; Colombia. <u>Cross-sectional</u>                       | White.                                                                                                                | Inventory (CRPBI). Parental psychological control – youth self-reported.                                                        |                                                                                                                 | Depression Inventory (CDI). Child Behaviour Checklist (anti-social behaviour).                          | youth depression (10/11 countries). Behavioural control associated with lower youth anti-social behaviour.                                                                       |    |
| 80. Khasakhala LI et al. (2012). Kenya. <u>Cross-sectional</u>                                 | 1,276 13-22 yr olds (747 M) from stratified sample of 17 Nairobi public secondary schools. Random sample.             | Adolescent completed 'Egna Minnen Beträfande Uppfostran' (EMBU) (own memories of childhood upbringing).                         | <u>Connection (lack of)</u>                                                                                     | Child Depression Inventory (CDI) for depressive disorders and suicidal behaviours.                      | No emotional attachment (both parents); maternal rejecting & paternal under-protective behaviour associated with adolescent depressive symptoms & suicidal behaviour.            | 1  |
| 81. Mashegoane S et al. (2007). South Africa. <u>Cross-sectional</u>                           | 522 university students (268 M). Average age 20.3 yrs. Convenience sample.                                            | Students' self-report – Parental Bonding Instrument (PBI)- maternal and paternal behaviours, separately.                        | <u>Connection</u><br><u>Negative behaviour control</u><br><u>Parenting styles: Authoritarian, Authoritative</u> | Beck's Depression Inventory (BDI-II)-measures students' depressive symptoms.                            | Maternal 'authoritarian' & paternal 'care' associated with increase in students' depressive symptoms. Paternal 'protectiveness' associated with decrease in depressive symptoms. | 4  |
| 82. Bireda AD (2015). Ethiopia. <u>Cross-sectional</u>                                         | 809 adolescents (427 M), mean age 16.8 yrs. Randomly selected from 4 Addis Ababa private and government high schools. | Adolescent report of parental 'warmth/affection' sub-scale of Child Parental Acceptance Rejection Control Questionnaire (PARQ). | <u>Connection</u>                                                                                               | Rosenberg self-esteem scale; school adjustment; 'CES-D' for depressive symptoms (adolescent completed). | Higher parental 'warmth' associated with: fewer school adjustment problems, decreased adolescent depression & increased self-esteem.                                             | 1  |

| <b>Supplementary Table 1.5: Parenting and Conduct Disorder (ASB) in Sub-Saharan Africa</b> |                                                                                                                                                        |                                                                                                                                                           |                                                                                             |                                                                                                                                                                                                                               |                                                                                                                                                                                                           |    |
|--------------------------------------------------------------------------------------------|--------------------------------------------------------------------------------------------------------------------------------------------------------|-----------------------------------------------------------------------------------------------------------------------------------------------------------|---------------------------------------------------------------------------------------------|-------------------------------------------------------------------------------------------------------------------------------------------------------------------------------------------------------------------------------|-----------------------------------------------------------------------------------------------------------------------------------------------------------------------------------------------------------|----|
| Study (Authors, Year); Location                                                            | Sampling Procedure (& Sample)                                                                                                                          | Parenting Variables                                                                                                                                       | WHO Parenting Dimensions                                                                    | Child/ Adolescent Health Outcomes                                                                                                                                                                                             | Main findings (significant at P<0.05)                                                                                                                                                                     | QA |
| 49. Kabiru CW et al. (2014). Kenya. <u>Cross-sectional</u>                                 | 3,064 12-22 yr olds from 2 slums, Nairobi. 1,566 M. Random sampling baseline survey of TTA study.                                                      | Composite index of severe 'Adverse Life Events'. Parental monitoring.                                                                                     | <u>Positive behaviour control</u><br><u>Negative behaviour control (severe experiences)</u> | Delinquent behaviour (adolescence).                                                                                                                                                                                           | 'Adversity' associated with delinquency. Higher parental monitoring associated with lower delinquency. Interaction between parental monitoring & number of adverse life events                            | 4  |
| 83. Casale M et al. (2015). South Africa. <u>Cross-sectional</u>                           | 2,477 10-17 yr olds (54% F) and adult caregiver (89%) dyads, from 1 urban/ 1 rural community, Kwazulu Natal. Stratified systematic random sampling.    | Caregiver reports: Alabama Parenting Questionnaire (APQ- short form) sub-scales on: positive parenting, consistency of discipline, caregiver supervision. | <u>Connection</u><br><u>Negative behaviour control</u>                                      | Care-giver reported Strengths and Difficulties Questionnaire (SDQ) measures: peer problems, hyperactivity, conduct problems, emotional symptoms, pro-social behaviour.                                                        | Carer social support and better parenting were predictors of fewer children/ adolescent: peer problems; hyperactivity, conduct problems & emotional symptoms.                                             | 5  |
| 84. Ward CL et al. (2015). South Africa. <u>Cross-sectional</u>                            | 220 caregivers reporting on their 213 6-18 yr old children (107 M). Rural community study.                                                             | Alabama Parenting Questionnaire (APQ). Parenting Stress Index (PSI) for parent-child dysfunctional interactions.                                          | <u>Negative behaviour control (severe)</u>                                                  | Parents completed Child Behaviour Checklist for children's externalising (aggressive) and internalising (anxiety and depression) behaviours.                                                                                  | Corporal punishment was associated with children's internalising and externalising symptoms.                                                                                                              | 4  |
| 85. Skeen S et al. (2016) South Africa, Malawi. <u>Cross-sectional</u>                     | 989 4-13 yr olds affected by HIV (51% F) with their carers. 834 from South Africa, 155 from Malawi. Stratified sampling procedure.                     | Carer reported harsh discipline practices – measures adapted from Parent-Child Conflict Tactics Scale and from ISPCAN screening tools.                    | <u>Negative behaviour control (severe)</u>                                                  | Child Depression Inventory (CDI); Trauma symptom checklist; Rosenberg self-esteem scale; Strengths & Difficulties Questionnaire (SDQ) (internalising +externalising problems). Adolescents reported on their risk behaviours. | Harsh physical & psychological discipline associated with lower self-esteem and more behavioural & emotional problems in adolescents.                                                                     | 5  |
| 86. Hecker T et al. (2014) Tanzania. <u>Cross-sectional</u>                                | 409 6-15 yr olds (mean age, 10.5 yrs), grade 2-7 (52% M). From (private) primary school, southern Tanzania.                                            | Children's report on corporal punishment by parents/carers-assessed by 4 questions.                                                                       | <u>Negative behaviour control (severe/ harsh)</u>                                           | Reactive Proactive Questionnaire (RPQ)-current/lifetime aggressive behaviour. Strengths & Difficulties Questionnaire (SDQ) internalising + externalising problems (self-report).                                              | Corporal punishment positively associated with children's current/ lifetime aggressive behaviour, conduct problems and hyperactivity. Prosocial behaviour negatively associated with corporal punishment. | 4  |
| 87. Waller R et al. (2014). South Africa. <u>Longitudinal</u>                              | 3, 515 10-17 yr olds (1,992 F) from 2 provinces (rural & urban) western Cape & Mpumlanga. 3,401 (97%) retained at 1 year follow up (57% F). Stratified | Harsh home/community environments. Youth self-report of physical and emotional abuse (UNICEF scales).                                                     | <u>Negative behaviour control (severe)</u>                                                  | Youth anti-social behaviour measured via delinquency sub-scale of 'CBCL-YSR'. Substance use (self-report).                                                                                                                    | Child emotional and physical harm predicted anti-social behaviour (ASB) over time.                                                                                                                        | 10 |

| <b>Supplementary Table 1.5: Parenting and Conduct Disorder (ASB) in Sub-Saharan Africa</b> |                                                                                    |                                                                                                                           |                                                                                           |                                                                                              |                                                                                                                                                          |    |
|--------------------------------------------------------------------------------------------|------------------------------------------------------------------------------------|---------------------------------------------------------------------------------------------------------------------------|-------------------------------------------------------------------------------------------|----------------------------------------------------------------------------------------------|----------------------------------------------------------------------------------------------------------------------------------------------------------|----|
| Study (Authors, Year); Location                                                            | Sampling Procedure (& Sample)                                                      | Parenting Variables                                                                                                       | WHO Parenting Dimensions                                                                  | Child/ Adolescent Health Outcomes                                                            | Main findings (significant at P<0.05)                                                                                                                    | QA |
|                                                                                            | random sampling.                                                                   |                                                                                                                           |                                                                                           |                                                                                              |                                                                                                                                                          |    |
| 88. Mbagaya C et al. (2013). Kenya, Zambia, Netherlands.<br><u>Cross-sectional</u>         | 862 university students (18-40 yr olds). 375 Kenyan, 182 Zambian, 305 Netherlands. | Self-reported childhood physical abuse and neglect. Child physical abuse scale of the Personal and Relationships profile. | <u>Connection (severe lack of)</u><br><u>Negative behaviour control (severe/punitive)</u> | Depressive symptoms, criminal tendencies, psychopathology, borderline personality disorders. | Childhood 'neglect' associated with depressive symptoms (3 countries). Physical 'abuse' associated with criminal tendencies in Kenyan & Zambian samples. | 5  |

| <b>Supplementary Table 1.6: Parenting and Substance Use in Sub-Saharan Africa</b>                                                               |                                                                                                                                                           |                                                                                                                                                    |                                                                                                                          |                                                                   |                                                                                                                                                                                                             |    |
|-------------------------------------------------------------------------------------------------------------------------------------------------|-----------------------------------------------------------------------------------------------------------------------------------------------------------|----------------------------------------------------------------------------------------------------------------------------------------------------|--------------------------------------------------------------------------------------------------------------------------|-------------------------------------------------------------------|-------------------------------------------------------------------------------------------------------------------------------------------------------------------------------------------------------------|----|
| Study (Authors, Year); Location                                                                                                                 | Sampling Procedure (& Sample)                                                                                                                             | Parenting Variables                                                                                                                                | WHO Parenting Dimensions                                                                                                 | Child/ Adolescent Health Outcomes                                 | Main findings (significant at P<0.05)                                                                                                                                                                       | QA |
| 54. Poms LW et al. (2012).Incl. Botswana, Kenya, Mauritius, Namibia, Senegal, Seychelles, Tanzania, Uganda, Zimbabwe.<br><u>Cross-sectional</u> | 106,041 middle school students (13-15 yr olds) from 27 countries, including 31,098 from 9 SSA countries. 2 stage cluster design, representative sampling. | Students' perceptions of: parents' tobacco use; parents 'understanding' and 'awareness' of children's activities.                                  | <u>Connection</u><br><u>Positive behaviour control</u><br><u>Role modelling</u>                                          | Tobacco use (adolescent report).                                  | Parental tobacco use associated with child tobacco use. Higher levels of parental 'understanding' (7/9 SSA countries) and monitoring (9/9 SSA countries) were associated with less tobacco use by children. | 5  |
| 89. Oladeji BD et al. (2010). Nigeria.<br><u>Cross-sectional</u>                                                                                | 2,143 adults, >50% aged <35 yrs (51% F). Range 18≥75 yrs. Multi-stage random sampling.                                                                    | 'Adverse Childhood Experiences' - neglect or abuse in family (being hit or unsupervised in childhood).                                             | <u>Connection (lack of)</u><br><u>Positive behaviour control (lack of)</u><br><u>Negative behaviour control (severe)</u> | Lifetime mental health disorders (incl. substance use disorders). | Childhood neglect or abuse associated with increased risk of substance use disorders (alcohol/drug dependency).                                                                                             | 5  |
| 90. Hoque M & Ghuman S (2012). South Africa.<br><u>Cross-sectional</u>                                                                          | 704 16-18 yr old students (421 F) from 5 Kwazulu Natal high schools. Convenience sample.                                                                  | Students' perceptions of: house rules about alcohol consumption; parental awareness and communication (about alcohol); parental alcohol behaviour. | <u>Positive behaviour control</u><br><u>Role modelling</u>                                                               | Alcohol use (adolescent report).                                  | Association between parents' & adolescent alcohol use. Adolescents more likely to use alcohol if ever seen parents drunk. Clear house rules protective factor for alcohol use among students.               | 3  |

**Supplementary Tables 1.1-1.6: Data Extraction Tables**
